# Supplementary material
Source: PubMed Central journal article supplement (PMC3336994)
Supplement: JCI62189sd.pdf [file JCI62189sd.pdf]

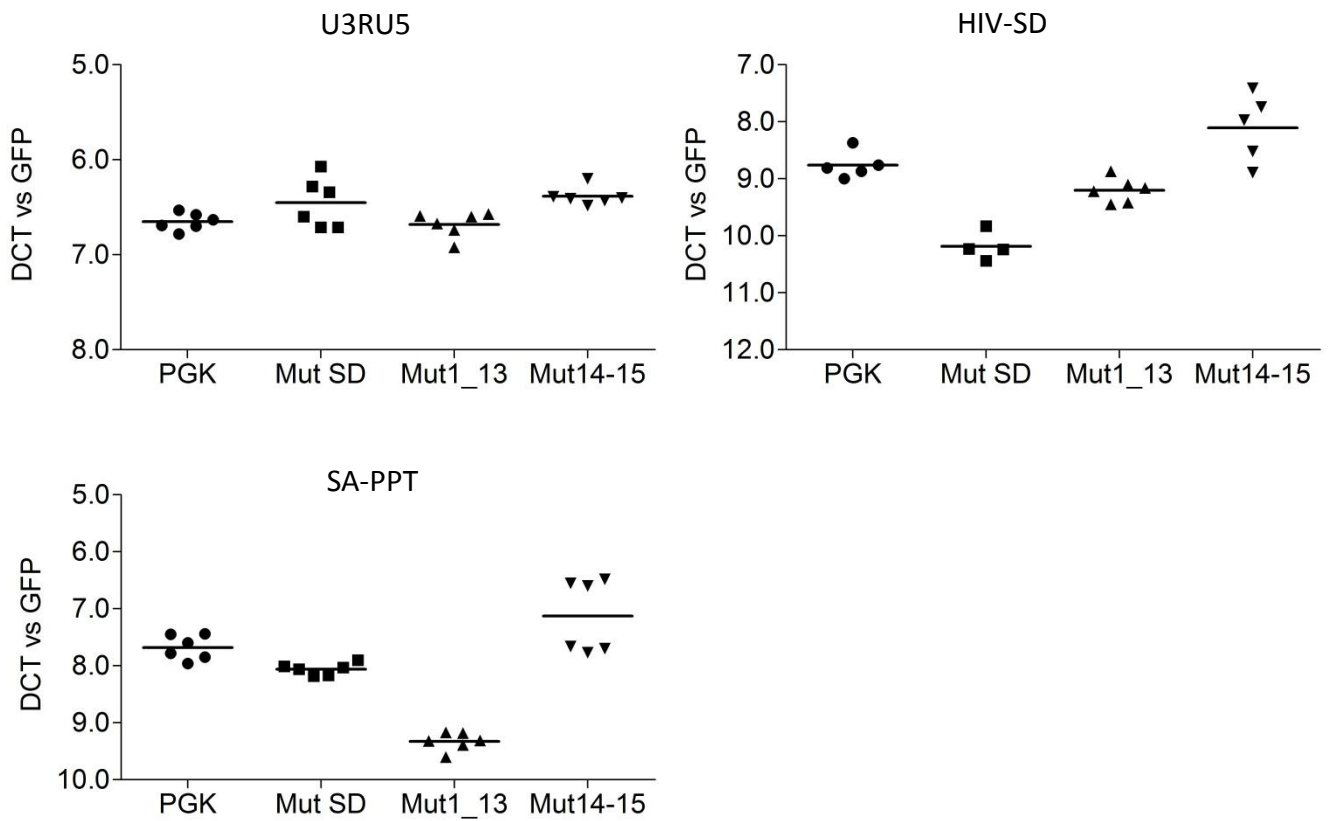

| Group               | U3RU5  | HIV-SD   | SAPPT    |
|---------------------|--------|----------|----------|
| Anova               | 0.0097 | < 0.0001 | < 0.0001 |
| PGK vs MutSD        | ns     | 0.001    | ns       |
| PGK vs Mut1_13      | ns     | ns       | < 0.0001 |
| PGK vs Mut14-15     | ns     | ns       | ns       |
| MutSD vs Mut1_13    | ns     | 0.01     | < 0.0001 |
| MutSD vs Mut14-15   | ns     | < 0.0001 | 0.01     |
| Mut1_13 vs Mut14-15 | 0.05   | 0.001    | < 0.0001 |

Supplemental Figure 1. Gene expression analyses of specific LV backbone positions on canonical and recoded vectors.

RT-qPCR results on transcription levels of different LV backbone portions performed on RNA extracted from JY cells transduced with SIN.LV.PGK and the recoded vectors MutSD, Mut 1\_13 and Mut 14\_15.

Each graph shows the  $\Delta C_t$  obtained with the probe sets U3RU5 HIV-SD and SA-PPT (indicated) normalized against GFP. The table below shows the comparative results of the ANOVA analysis.

Supplemental Table 1

| Cell Type | Primer set | Fusion Structure                     | Target | Chr | Chr Position | Str | Gene            | Junction Seq |
|-----------|------------|--------------------------------------|--------|-----|--------------|-----|-----------------|--------------|
| CD34      | DWLUSA     | 5' cell_exon - LV.exon_2             | ex_3   | 6   | 43446456     | -   | <i>TJAP1</i>    | TTGGTA       |
| CD34      | UPLVSD     | LV.exon_1 - 3' cell_exon             | ex_8   | 2   | 71597013     | +   | <i>ZNF638</i>   | AGGCTT       |
| CD34      | UPLVSD     | LV.exon_1 - 3' cell_exon             | ex_8   | 3   | 63819875     | -   | <i>THOC7</i>    | CATCTG       |
| CD34      | UPLVSD     | LV.exon_1 - 3' cell_exon             | ex_6   | 4   | 190878553    | +   | <i>FRG1</i>     | AGGGGA       |
| CD34      | UPLVSD     | LV.exon_1 - 3' cell_exon             | ex_4   | 7   | 35912276     | +   | <i>SEPT7</i>    | AGGTGG       |
| CD34      | UPLVSD     | LV.exon_1 - 3' cell_exon             | ex_2   | 7   | 74047983     | +   | <i>AY927540</i> | AGGTCT       |
| CD34      | UPLVSD     | LV.exon_1 - 3' cell_exon             | ex_11  | 11  | 17336933     | +   | <i>NUCB2</i>    | AGGTTG       |
| CD34      | UPLVSD     | LV.exon_1 - 3' cell_exon             | ex_7   | 18  | 33270976     | +   | <i>GALNT1</i>   | AGATTT       |
| CD34      | UPLVSD     | LV.exon_1 - 3' cell_exon             | ex_25  | 18  | 39661087     | +   | <i>PIK3C3</i>   | AGTACT       |
| CD34      | UPLVSD     | LV.exon_1 - 3' cell_exon             | ex_5   | 19  | 13051057     | +   | <i>CALR</i>     | AGGATG       |
| CD34      | UPLVSD     | LV.exon_1 - 3' cell_exon             | ex_3   | 20  | 32659872     | +   | <i>RALY</i>     | AGGTGG       |
| CD34      | UPLVSD     | LV.exon_1 - 3' cell_exon             | ex_3   | 22  | 42071200     | -   | <i>NHP2L1</i>   | GGCTGC       |
| CD34      | UPLVSD     | LV.exon_1 - 3' cell_intron           | intr_6 | 17  | 62147124     | +   | <i>ERN1</i>     | AGGTCT       |
| CD34      | UPLVSD     | LV.exon_1 - LV.exon_2 - 3' cell_exon | ex_10  | 2   | 114709297    | +   | <i>ACTR3</i>    | AGAATA       |
| CD34      | UPLVSD     | LV.exon_1 - LV.exon_2 - 3' cell_exon | ex_8   | 2   | 174946789    | -   | <i>OLA1</i>     | ATCAAC       |
| CD34      | UPLVSD     | LV.exon_1 - LV.exon_2 - 3' cell_exon | ex_5   | 5   | 154339540    | +   | <i>MRPL22</i>   | AGGTTC       |
| JY        | DWcrypSA   | 5' cell_exon - LV.exon_1             | ex_3   | 1   | 183775619    | -   | <i>RGL1</i>     | GGGGTG       |
| JY        | DWcrypSA   | 5' cell_exon - LV.exon_1             | ex_8   | 2   | 85770157     | -   | <i>MAT2A</i>    | CAGGTA       |
| JY        | DWcrypSA   | 5' cell_exon - LV.exon_1             | ex_2   | 6   | 31590678     | -   | <i>PRRC2A</i>   | CTGGTG       |
| JY        | DWcrypSA   | 5' cell_exon - LV.exon_1             | ex_8   | 7   | 6624891      | -   | <i>ZDHHC4</i>   | CAGGTA       |
| JY        | DWcrypSA   | 5' cell_exon - LV.exon_1             | ex_2   | 7   | 100473333    | -   | <i>SRRT</i>     | CAGGTG       |
| JY        | DWcrypSA   | 5' cell_exon - LV.exon_1             | ex_19  | 9   | 131348127    | -   | <i>SPTAN1</i>   | GAGGAC       |
| JY        | DWcrypSA   | 5' cell_exon - LV.exon_1             | ex_5   | 10  | 98704002     | -   | <i>LCOR</i>     | AAGGTT       |
| JY        | DWcrypSA   | 5' cell_exon - LV.exon_1             | ex_10  | 11  | 32990689     | -   | <i>QSER1</i>    | AAGGTA       |
| JY        | DWcrypSA   | 5' cell_exon - LV.exon_1             | ex_16  | 15  | 67995746     | -   | <i>MAP2K5</i>   | GAGGTA       |
| JY        | DWcrypSA   | 5' cell_exon - LV.exon_1             | ex_4   | 16  | 2807946      | -   | <i>SRRM2</i>    | CAGGTA       |

| Cell Type | Primer set | Fusion Structure                     | Target | Chr | Chr Position | Str | Gene            | Junction Seq    |
|-----------|------------|--------------------------------------|--------|-----|--------------|-----|-----------------|-----------------|
| JY        | DWcrypSA   | 5' cell_exon - LV.exon_1             | ex_5   | 16  | 15771806     | -   | <i>NDE1</i>     | GCG <b>GTA</b>  |
| JY        | DWcrypSA   | 5' cell_exon - LV.exon_1             | ex_2   | 16  | 29828613     | -   | <i>C16orf53</i> | CAG <b>GTA</b>  |
| JY        | DWcrypSA   | 5' cell_exon - LV.exon_1             | ex_23  | 16  | 30522249     | -   | <i>ITGAL</i>    | GGGG <b>AC</b>  |
| JY        | DWcrypSA   | 5' cell_exon - LV.exon_1             | ex_6   | 16  | 50788335     | -   | <i>CYLD</i>     | CAG <b>GTA</b>  |
| JY        | DWcrypSA   | 5' cell_exon - LV.exon_1             | ex_13  | 19  | 10793272     | -   | <i>ILF3</i>     | GAG <b>GAC</b>  |
| JY        | DWcrypSA   | 5' cell_exon - LV.exon_1             | ex_14  | 19  | 11114073     | -   | <i>SMARCA4</i>  | GAG <b>GTA</b>  |
| JY        | DWcrypSA   | 5' cell_exon - LV.exon_1             | ex_4   | 19  | 52085135     | -   | <i>ZNF175</i>   | AAG <b>G TG</b> |
| JY        | DWcrypSA   | 5' cell_exon - LV.exon_1             | ex_3   | 1   | 32377297     | +   | <i>PTP4A2</i>   | <b>ACCTTC</b>   |
| JY        | DWcrypSA   | 5' cell_exon - LV.exon_1             | ex_1   | 1   | 45987281     | +   | <i>PRDX1</i>    | <b>GCCTTG</b>   |
| JY        | DWcrypSA   | 5' cell_exon - LV.exon_1             | ex_2   | 3   | 141811903    | +   | <i>TFDP2</i>    | <b>ACCTTT</b>   |
| JY        | DWcrypSA   | 5' cell_exon - LV.exon_1             | ex_7   | 7   | 37272700     | +   | <i>ELMO1</i>    | <b>ACCTTC</b>   |
| JY        | DWcrypSA   | 5' cell_exon - LV.exon_1             | ex_3   | 7   | 130630479    | +   | <i>FLJ43663</i> | <b>ACCTCA</b>   |
| JY        | DWLVSAs    | 5' cell_exon - LV.exon_1 - LV.exon_2 | ex_3   | 7   | 130630479    | +   | <i>FLJ43663</i> | <b>ACCTCA</b>   |
| JY        | DWcrypSA   | 5' cell_exon - LV.exon_1             | ex_12  | 10  | 75138668     | +   | <i>ANXA7</i>    | <b>ACCTCAC</b>  |
| JY        | DWcrypSA   | 5' cell_exon - LV.exon_1             | ex_1   | 11  | 47869400     | +   | <i>NUP160</i>   | <b>ACCAAT</b>   |
| JY        | DWcrypSA   | 5' cell_exon - LV.exon_1             | ex_2   | 12  | 56579939     | +   | <i>SMARCC2</i>  | <b>ACCATC</b>   |
| JY        | DWcrypSA   | 5' cell_exon - LV.exon_1             | ex_28  | 12  | 133233722    | +   | <i>POLE</i>     | <b>ACCTGT</b>   |
| JY        | DWcrypSA   | 5' cell_exon-LV.exon_1b              | ex_28  | 12  | 133233722    | +   | <i>POLE</i>     | <b>ACCTGT</b>   |
| JY        | DWcrypSA   | 5' cell_exon - LV.exon_1             | ex_24  | 17  | 1565252      | +   | <i>PRPF8</i>    | <b>TCCACC</b>   |
| JY        | DWcrypSA   | 5' cell_exon - LV.exon_1             | ex_6   | 17  | 5377969      | +   | <i>DERL2</i>    | <b>TCCTTC</b>   |
| JY        | DWcrypSA   | 5' cell_exon - LV.exon_1             | ex_1   | 17  | 76834669     | +   | <i>USP36</i>    | <b>ACCTGG</b>   |
| JY        | DWcrypSA   | 5' cell_exon - LV.exon_1             | ex_3   | 17  | 79813018     | +   | <i>P4HB</i>     | <b>ACCTTC</b>   |
| JY        | DWcrypSA   | 5' cell_exon-LV.exon_1b              | ex_3   | 17  | 79813018     | +   | <i>P4HB</i>     | <b>ACCTTC</b>   |
| JY        | DWcrypSA   | 5' cell_exon - LV.exon_1             | ex_4   | 19  | 2046185      | +   | <i>MKMK2</i>    | <b>ACCTTG</b>   |
| JY        | DWcrypSA   | 5' cell_exon - LV.exon_1             | ex_6   | 19  | 3981337      | +   | <i>EEF2</i>     | <b>ACCTTC</b>   |
| JY        | DWLVSAs    | 5' cell_exon-LV.exon_1a - LV.exon_2  | ex_6   | 19  | 3981337      | +   | <i>EEF2</i>     | <b>ACCTTC</b>   |
| JY        | DWcrypSA   | 5' cell_exon - LV.exon_1             | ex_5   | 19  | 40587726     | +   | <i>ZNF780A</i>  | <b>ACCTGG</b>   |

| Cell Type | Primer set | Fusion Structure                     | Target | Chr | Chr Position | Str | Gene              | Junction Seq |
|-----------|------------|--------------------------------------|--------|-----|--------------|-----|-------------------|--------------|
| JY        | DWcrypSA   | 5' cell_exon - LV.exon_1             | ex_4   | 19  | 45922356     | +   | <i>ERCC1</i>      | ACCACA       |
| JY        | DWcrypSA   | 5' cell_exon - LV.exon_1             | ex_4   | X   | 20213183     | +   | <i>RPS6KA3</i>    | ACCATA       |
| JY        | DWLUSA     | 5' cell_exon - LV.exon_1 - LV.exon_2 | ex_4   | 17  | 80529746     | -   | <i>FOXK2</i>      | CAGGTA       |
| JY        | DWcrypSA   | 5' cell_intr - LV.exon_1             | intr_2 | 9   | 37251841     | -   | <i>ZCCHC7</i>     | CTGTGC       |
| JY        | DWcrypSA   | 5' cell_intr - LV.exon_1             | intr_7 | 2   | 53928525     | +   | <i>GPR75-ASB3</i> | AGCTGA       |
| JY        | DWcrypSA   | 5' interg - LV.exon_1                | interg | X   | 74965307     | +   | <i>None</i>       | TCCTGG       |
| JY        | DWcrypSA   | 5' cell_exon - LV.exon_1             | ex_1   | 1   | 160681472    | -   | <i>CD48</i>       | ACCTTG       |
| JY        | DWcrypSA   | 5' cell_exon - LV.exon_1             | ex_2   | 4   | 184577034    | -   | <i>RWDD4A</i>     | ACCCTA       |
| JY        | DWcrypSA   | 5' cell_exon - LV.exon_1             | ex_5   | 12  | 7344296      | +   | <i>PEX5</i>       | CAGGTG       |
| JY        | DWcrypSA   | 5' cell_exon - LV.exon_1             | ex_4   | 16  | 1779579      | +   | <i>MAPK8IP3</i>   | GAGGTA       |
| JY        | DWcrypSA   | 5' cell_exon - LV.exon_1             | ex_4   | 16  | 67116211     | +   | <i>CBFB</i>       | GAGGTG       |
| JY        | DWcrypSA   | 5' cell_exon - LV.exon_1             | ex_10  | 19  | 10748991     | +   | <i>SLC44A2</i>    | CTGGTA       |
| JY        | DWcrypSA   | 5' cell_exon - LV.exon_1             | ex_4   | 21  | 17909759     | +   | <i>LINC00478</i>  | CAGGTA       |
| JY        | DWLUSA     | 5' cell_exon - LV.exon_2             | ex_2   | 2   | 208425883    | -   | <i>CREB1</i>      | ACAGGT       |
| JY        | DWLUSA     | 5' cell_exon - LV.exon_2             | ex_1   | 10  | 98031109     | -   | <i>BLNK</i>       | ACCTCA       |
| JY        | DWLUSA     | 5' cell_exon - LV.exon_2             | ex_41  | X   | 153580253    | +   | <i>FLNA</i>       | CCTGGC       |
| JY        | DWLUSA     | 5' cell_exon - LV.exon_3             | ex_4   | 16  | 24981828     | -   | <i>ARHGAP17</i>   | ACCCCA       |
| JY        | DWLUSA     | 5' cell_exon - LV.exon_4             | ex_1   | 20  | 61847484     | -   | <i>YTHDF1</i>     | ACAGCA       |
| JY        | DWcrypSA   | 5' cell_exon-LV.exon_1a              | ex_4   | 1   | 44280605     | -   | <i>ST3GAL3</i>    | ACTGTG       |
| JY        | DWcrypSA   | 5' cell_exon-LV.exon_1a              | ex_5   | 2   | 28210954     | -   | <i>BRE</i>        | CAGGTG       |
| JY        | DWcrypSA   | 5' cell_exon-LV.exon_1a              | ex_3   | 2   | 152267852    | -   | <i>RIF1</i>       | AAGGTA       |
| JY        | DWcrypSA   | 5' cell_exon-LV.exon_1a              | ex_33  | 6   | 33648457     | -   | <i>ITPR3</i>      | CAGGTG       |
| JY        | DWcrypSA   | 5' cell_exon-LV.exon_1a              | ex_9   | 6   | 43573056     | -   | <i>POLH</i>       | GATGTA       |
| JY        | DWcrypSA   | 5' cell_exon-LV.exon_1a              | ex_2   | 11  | 66888829     | -   | <i>KDM2A</i>      | TTGGTT       |
| JY        | DWcrypSA   | 5' cell_exon-LV.exon_1a              | ex_11  | 11  | 66995634     | -   | <i>KDM2A</i>      | TGGGTA       |
| JY        | DWcrypSA   | 5' cell_exon-LV.exon_1a              | ex_3   | 14  | 103894777    | -   | <i>MARK3</i>      | AAGGTA       |
| JY        | DWcrypSA   | 5' cell_exon-LV.exon_1a              | ex_4   | 16  | 89628799     | -   | <i>RPL13</i>      | AACGTA       |

| Cell Type | Primer set | Fusion Structure                    | Target | Chr | Chr Position | Str | Gene    | Junction Seq |
|-----------|------------|-------------------------------------|--------|-----|--------------|-----|---------|--------------|
| JY        | DWcrypSA   | 5' cell_exon-LV.exon_1a             | ex_11  | 19  | 14512572     | -   | CD97    | CAGGTA       |
| JY        | DWcrypSA   | 5' cell_exon-LV.exon_1a             | ex_6   | 20  | 2903931      | -   | PTPRA   | AAGGTA       |
| JY        | DWcrypSA   | 5' cell_exon-LV.exon_1a             | ex_2   | 22  | 50810579     | -   | SAPS2   | AAGGTA       |
| JY        | DWcrypSA   | 5' cell_exon-LV.exon_1a             | ex_1   | 22  | 50946874     | -   | NCAPH2  | GAGGTA       |
| JY        | DWcrypSA   | 5' cell_exon-LV.exon_1a             | ex_1   | 1   | 3563972      | +   | WDR8    | ACCTGC       |
| JY        | DWcrypSA   | 5' cell_exon-LV.exon_1a             | ex_1   | 1   | 160681472    | +   | CD48    | ACCTTG       |
| JY        | DWcrypSA   | 5' cell_exon-LV.exon_1a             | ex_1   | 1   | 236433175    | +   | ERO1LB  | ACCTTG       |
| JY        | DWcrypSA   | 5' cell_exon-LV.exon_1a             | ex_3   | 2   | 55445008     | +   | C2orf63 | CAAACC       |
| JY        | DWcrypSA   | 5' cell_exon-LV.exon_1a             | ex_22  | 2   | 55871772     | +   | PNPT1   | ACCTGT       |
| JY        | DWcrypSA   | 5' cell_exon-LV.exon_1a             | ex_7   | 3   | 47755905     | +   | SMARCC1 | ACCTTC       |
| JY        | DWcrypSA   | 5' cell_exon-LV.exon_1a             | ex_5   | 7   | 72903524     | +   | BAZ1B   | ACCTTG       |
| JY        | DWcrypSA   | 5' cell_exon-LV.exon_1a             | ex_1   | 8   | 117738255    | +   | EIF3H   | ACCTTC       |
| JY        | DWcrypSA   | 5' cell_exon-LV.exon_1a             | ex_22  | 15  | 51778270     | +   | DMXL2   | ACCTTG       |
| JY        | DWcrypSA   | 5' cell_exon-LV.exon_1a             | ex_5   | 15  | 77344727     | +   | TSPAN3  | ACCTGA       |
| JY        | DWcrypSA   | 5' cell_exon-LV.exon_1a             | ex_12  | 17  | 2075952      | +   | SMG6    | ACCTTA       |
| JY        | DWLVSA     | 5' cell_exon-LV.exon_1b - LV.exon_2 | ex_12  | 17  | 2075952      | +   | SMG6    | ACCTTA       |
| JY        | DWcrypSA   | 5' cell_exon-LV.exon_1a             | ex_8   | 19  | 36386882     | +   | NFKBID  | ACCTGG       |
| JY        | DWLVSA     | 5' cell_exon-LV.exon_1a - LV.exon_2 | ex_11  | 12  | 110600870    | -   | IFT81   | GAGGTA       |
| JY        | DWLVSA     | 5' cell_exon-LV.exon_1a - LV.exon_2 | ex_4   | 12  | 113698297    | -   | TPCN1   | CAGGTG       |
| JY        | DWLVSA     | 5' cell_exon-LV.exon_1a - LV.exon_2 | ex_9   | 19  | 6745005      | -   | TRIP10  | AAGGTG       |
| JY        | DWcrypSA   | 5' cell_exon-LV.exon_1b             | ex_15  | 1   | 161882142    | -   | ATF6    | TCAATT       |
| JY        | DWcrypSA   | 5' cell_exon-LV.exon_1b             | ex_1   | 1   | 186349016    | -   | C1orf27 | CAGGTA       |
| JY        | DWcrypSA   | 5' cell_exon-LV.exon_1b             | ex_1   | 2   | 65283662     | -   | CEP68   | TAGGTA       |
| JY        | DWcrypSA   | 5' cell_exon-LV.exon_1b             | ex_2   | 3   | 47437707     | -   | PTPN23  | CAGGTA       |
| JY        | DWcrypSA   | 5' cell_exon-LV.exon_1b             | ex_2   | 3   | 113604431    | -   | GRAMD1C | AAGGTG       |
| JY        | DWcrypSA   | 5' cell_exon-LV.exon_1b             | ex_1   | 4   | 40198920     | -   | RHOH    | CAGGTA       |
| JY        | DWcrypSA   | 5' cell_exon-LV.exon_1b             | ex_3   | 4   | 44682859     | -   | GUF1    | CCGGTA       |

| Cell Type | Primer set | Fusion Structure        | Target | Chr | Chr Position | Str | Gene           | Junction Seq                     |
|-----------|------------|-------------------------|--------|-----|--------------|-----|----------------|----------------------------------|
| JY        | DWcrypSA   | 5' cell_exon-LV.exon_1b | ex_2   | 4   | 87593696     | -   | <i>PTPN13</i>  | AAG <b>G</b> TA                  |
| JY        | DWcrypSA   | 5' cell_exon-LV.exon_1b | ex_5   | 5   | 60817269     | -   | <i>ZSWIM6</i>  | AAG <b>G</b> TG                  |
| JY        | DWcrypSA   | 5' cell_exon-LV.exon_1b | ex_6   | 5   | 149915447    | -   | <i>NDST1</i>   | AT <b>G</b> TG                   |
| JY        | DWcrypSA   | 5' cell_exon-LV.exon_1b | ex_26  | 5   | 169230210    | -   | <i>DOCK2</i>   | G <b>C</b> G <b>T</b> G          |
| JY        | DWcrypSA   | 5' cell_exon-LV.exon_1b | ex_4   | 8   | 6590171      | -   | <i>AGPAT5</i>  | CC <b>A</b> G <b>T</b> A         |
| JY        | DWcrypSA   | 5' cell_exon-LV.exon_1b | ex_7   | 8   | 27255305     | -   | <i>PTK2B</i>   | CG <b>G</b> G <b>T</b> A         |
| JY        | DWcrypSA   | 5' cell_exon-LV.exon_1b | ex_1   | 8   | 145515556    | -   | <i>HSF1</i>    | CC <b>G</b> G <b>T</b> G         |
| JY        | DWcrypSA   | 5' cell_exon-LV.exon_1b | ex_10  | 9   | 139313558    | -   | <i>PMPCA</i>   | AC <b>G</b> G <b>T</b> A         |
| JY        | DWcrypSA   | 5' cell_exon-LV.exon_1b | ex_4   | 9   | 139983457    | -   | <i>MAN1B1</i>  | C <b>A</b> G <b>G</b> T <b>A</b> |
| JY        | DWcrypSA   | 5' cell_exon-LV.exon_1b | ex_13  | 10  | 21971186     | -   | <i>MLLT10</i>  | AC <b>G</b> G <b>T</b> A         |
| JY        | DWcrypSA   | 5' cell_exon-LV.exon_1b | ex_3   | 10  | 75506762     | -   | <i>SEC24C</i>  | A <b>A</b> G <b>G</b> T <b>A</b> |
| JY        | DWcrypSA   | 5' cell_exon-LV.exon_1b | ex_10  | 11  | 250865       | -   | <i>PSMD13</i>  | G <b>A</b> G <b>G</b> T <b>A</b> |
| JY        | DWcrypSA   | 5' cell_exon-LV.exon_1b | ex_4   | 11  | 67197066     | -   | <i>RPS6KB2</i> | A <b>A</b> G <b>G</b> T <b>G</b> |
| JY        | DWcrypSA   | 5' cell_exon-LV.exon_1b | ex_2   | 11  | 72527872     | -   | <i>ATG16L2</i> | CT <b>G</b> G <b>T</b> A         |
| JY        | DWcrypSA   | 5' cell_exon-LV.exon_1b | ex_3   | 11  | 121175202    | -   | <i>SC5DL</i>   | AT <b>G</b> G <b>T</b> A         |
| JY        | DWcrypSA   | 5' cell_exon-LV.exon_1b | ex_5   | 14  | 60758172     | -   | <i>PPM1A</i>   | ACT <b>G</b> T <b>A</b>          |
| JY        | DWcrypSA   | 5' cell_exon-LV.exon_1b | ex_2   | 14  | 64375945     | -   | <i>SYNE2</i>   | A <b>A</b> G <b>G</b> T <b>A</b> |
| JY        | DWcrypSA   | 5' cell_exon-LV.exon_1b | ex_6   | 14  | 96994343     | -   | <i>PAPOLA</i>  | G <b>A</b> G <b>G</b> T <b>A</b> |
| JY        | DWcrypSA   | 5' cell_exon-LV.exon_1b | ex_2   | 15  | 76146828     | -   | <i>UBE2Q2</i>  | TT <b>G</b> G <b>T</b> A         |
| JY        | DWcrypSA   | 5' cell_exon-LV.exon_1b | ex_2   | 16  | 27414541     | -   | <i>IL21R</i>   | AT <b>G</b> G <b>T</b> A         |
| JY        | DWcrypSA   | 5' cell_exon-LV.exon_1b | ex_19  | 17  | 7407110      | -   | <i>POLR2A</i>  | ATT <b>G</b> T <b>G</b>          |
| JY        | DWcrypSA   | 5' cell_exon-LV.exon_1b | ex_3   | 17  | 25877734     | -   | <i>KSR1</i>    | C <b>A</b> G <b>G</b> T <b>A</b> |
| JY        | DWcrypSA   | 5' cell_exon-LV.exon_1b | ex_3   | 17  | 79852462     | -   | <i>ANAPC11</i> | ACT <b>G</b> T <b>G</b>          |
| JY        | DWcrypSA   | 5' cell_exon-LV.exon_1b | ex_3   | 19  | 1244184      | -   | <i>ATP5D</i>   | GG <b>G</b> G <b>T</b> G         |
| JY        | DWcrypSA   | 5' cell_exon-LV.exon_1b | ex_2   | 19  | 7070664      | -   | <i>ZNF557</i>  | C <b>A</b> G <b>G</b> T <b>A</b> |
| JY        | DWcrypSA   | 5' cell_exon-LV.exon_1b | ex_7   | 19  | 13051701     | -   | <i>CALR</i>    | C <b>A</b> G <b>G</b> T <b>G</b> |
| JY        | DWcrypSA   | 5' cell_exon-LV.exon_1b | ex_2   | 19  | 17671274     | -   | <i>GLT25D1</i> | CT <b>G</b> G <b>T</b> A         |

| Cell Type | Primer set | Fusion Structure        | Target | Chr | Chr Position | Str | Gene              | Junction Seq |
|-----------|------------|-------------------------|--------|-----|--------------|-----|-------------------|--------------|
| JY        | DWcrypSA   | 5' cell_exon-LV.exon_1b | ex_7   | 19  | 17877619     | -   | <i>FCHO1</i>      | AAGGTG       |
| JY        | DWcrypSA   | 5' cell_exon-LV.exon_1b | ex_5   | 19  | 49841286     | -   | <i>CD37</i>       | CAGGTA       |
| JY        | DWcrypSA   | 5' cell_exon-LV.exon_1b | ex_3   | 19  | 50185516     | -   | <i>PRMT1</i>      | ACGGTG       |
| JY        | DWcrypSA   | 5' cell_exon-LV.exon_1b | ex_2   | 20  | 35812776     | -   | <i>RPN2</i>       | AAGGTA       |
| JY        | DWcrypSA   | 5' cell_exon-LV.exon_1b | ex_2   | 20  | 35993680     | -   | <i>SRC</i>        | CAGGTA       |
| JY        | DWcrypSA   | 5' cell_exon-LV.exon_1b | ex_6   | 22  | 3981485      | -   | <i>TAB1</i>       | TGGGTG       |
| JY        | DWcrypSA   | 5' cell_exon-LV.exon_1b | ex_5   | 22  | 50633469     | -   | <i>TRABD</i>      | CAGGTG       |
| JY        | DWcrypSA   | 5' cell_exon-LV.exon_1b | ex_2   | 1   | 1756836      | +   | <i>GNB1</i>       | ACTCGA       |
| JY        | DWcrypSA   | 5' cell_exon-LV.exon_1b | ex_10  | 2   | 48059488     | +   | <i>FBXO11</i>     | ACCATG       |
| JY        | DWcrypSA   | 5' cell_exon-LV.exon_1b | ex_11  | 2   | 160731955    | +   | <i>LY75-CD302</i> | ACCTTA       |
| JY        | DWcrypSA   | 5' cell_exon-LV.exon_1b | ex_1   | 2   | 230744698    | +   | <i>TRIP12</i>     | ACCTTC       |
| JY        | DWcrypSA   | 5' cell_exon-LV.exon_1b | ex_1   | 3   | 49129830     | +   | <i>QRICH1</i>     | ACCAGT       |
| JY        | DWcrypSA   | 5' cell_exon-LV.exon_1b | ex_16  | 4   | 68510416     | +   | <i>UBA6</i>       | ACCATT       |
| JY        | DWcrypSA   | 5' cell_exon-LV.exon_1b | ex_9   | 4   | 106307724    | +   | <i>PPA2</i>       | ACCGAT       |
| JY        | DWcrypSA   | 5' cell_exon-LV.exon_1b | ex_8   | 6   | 30675161     | +   | <i>MDC1</i>       | ACCCTG       |
| JY        | DWcrypSA   | 5' cell_exon-LV.exon_1b | ex_6   | 8   | 80954855     | +   | <i>TPD52</i>      | GCCTTT       |
| JY        | DWcrypSA   | 5' cell_exon-LV.exon_1b | ex_3   | 8   | 145979068    | +   | <i>ZNF251</i>     | ACCTTT       |
| JY        | DWcrypSA   | 5' cell_exon-LV.exon_1b | ex_3   | 9   | 114213705    | +   | <i>KIAA0368</i>   | ACCTTT       |
| JY        | DWcrypSA   | 5' cell_exon-LV.exon_1b | ex_7   | 9   | 132689475    | +   | <i>FNBP1</i>      | CATTTT       |
| JY        | DWcrypSA   | 5' cell_exon-LV.exon_1b | ex_6   | 9   | 132691846    | +   | <i>FNBP1</i>      | ACCTGG       |
| JY        | DWcrypSA   | 5' cell_exon-LV.exon_1b | ex_3   | 9   | 138758302    | +   | <i>CAMSAP1</i>    | ACCTTT       |
| JY        | DWcrypSA   | 5' cell_exon-LV.exon_1b | ex_1   | 9   | 139292751    | +   | <i>SNAPC4</i>     | ACCTGC       |
| JY        | DWcrypSA   | 5' cell_exon-LV.exon_1b | ex_6   | 10  | 101933965    | +   | <i>ERLIN1</i>     | ACCTGT       |
| JY        | DWcrypSA   | 5' cell_exon-LV.exon_1b | ex_1   | 10  | 104465103    | +   | <i>ARL3</i>       | ACCTGT       |
| JY        | DWcrypSA   | 5' cell_exon-LV.exon_1b | ex_1   | 11  | 46842726     | +   | <i>CKAP5</i>      | ACCTTG       |
| JY        | DWcrypSA   | 5' cell_exon-LV.exon_1b | ex_1   | 11  | 62356503     | +   | <i>TUT1</i>       | ACCTTG       |
| JY        | DWcrypSA   | 5' cell_exon-LV.exon_1b | intr_2 | 11  | 110150054    | +   | <i>RDX</i>        | TATGGT       |

| Cell Type | Primer set | Fusion Structure                    | Target | Chr | Chr Position | Str | Gene            | Junction Seq |
|-----------|------------|-------------------------------------|--------|-----|--------------|-----|-----------------|--------------|
| JY        | DWcrypSA   | 5' cell_exon-LV.exon_1b             | ex_8   | 12  | 53589158     | +   | <i>ITGB7</i>    | ACATTA       |
| JY        | DWcrypSA   | 5' cell_exon-LV.exon_1b             | ex_4   | 12  | 56578628     | +   | <i>SMARCC2</i>  | ACCTGG       |
| JY        | DWcrypSA   | 5' cell_exon-LV.exon_1b             | ex_1   | 12  | 57029966     | +   | <i>BAZ2A</i>    | ACCCAT       |
| JY        | DWcrypSA   | 5' cell_exon-LV.exon_1b             | ex_2   | 12  | 109072048    | +   | <i>CORO1C</i>   | ACCATG       |
| JY        | DWcrypSA   | 5' cell_exon-LV.exon_1b             | ex_3   | 13  | 95243107     | +   | <i>TGDS</i>     | ACCTAC       |
| JY        | DWcrypSA   | 5' cell_exon-LV.exon_1b             | ex_2   | 14  | 91875003     | +   | <i>CCDC88C</i>  | ACCTGG       |
| JY        | DWcrypSA   | 5' cell_exon-LV.exon_1b             | ex_4   | 15  | 59204762     | +   | <i>SLTM</i>     | ACTTGG       |
| JY        | DWcrypSA   | 5' cell_exon-LV.exon_1b             | ex_4   | 15  | 62325640     | +   | <i>VPS13C</i>   | ACCTTT       |
| JY        | DWcrypSA   | 5' cell_exon-LV.exon_1b             | ex_8   | 15  | 76566753     | +   | <i>ETFA</i>     | ACTGGT       |
| JY        | DWcrypSA   | 5' cell_exon-LV.exon_1b             | ex_3   | 16  | 786270       | +   | <i>NARFL</i>    | ATTTTT       |
| JY        | DWcrypSA   | 5' cell_exon-LV.exon_1b             | ex_3   | 16  | 11824501     | +   | <i>TXNDC11</i>  | ACCTCG       |
| JY        | DWcrypSA   | 5' cell_exon-LV.exon_1b             | ex_1   | 16  | 74640555     | +   | <i>GLG1</i>     | ACCTCC       |
| JY        | DWcrypSA   | 5' cell_exon-LV.exon_1b             | ex_19  | 16  | 89845209     | +   | <i>FANCA</i>    | ACCTCT       |
| JY        | DWcrypSA   | 5' cell_exon-LV.exon_1b             | ex_2   | 16  | 89880933     | +   | <i>FANCA</i>    | TAAATG       |
| JY        | DWcrypSA   | 5' cell_exon-LV.exon_1b             | ex_6   | 17  | 7504727      | +   | <i>FXR2</i>     | ACCTCT       |
| JY        | DWcrypSA   | 5' cell_exon-LV.exon_1b             | ex_12  | 17  | 37421650     | +   | <i>FBXL20</i>   | ACCAAT       |
| JY        | DWcrypSA   | 5' cell_exon-LV.exon_1b             | ex_1   | 17  | 38020373     | +   | <i>IKZF3</i>    | ACCTTC       |
| JY        | DWcrypSA   | 5' cell_exon-LV.exon_1b             | ex_2   | 17  | 42400652     | +   | <i>SLC25A39</i> | ACCGCT       |
| JY        | DWcrypSA   | 5' cell_exon-LV.exon_1b             | ex_2   | 17  | 76704279     | +   | <i>CYTH1</i>    | ACCTTT       |
| JY        | DWcrypSA   | 5' cell_exon-LV.exon_1b             | ex_4   | 17  | 80583265     | +   | <i>WDR45L</i>   | ACCTTT       |
| JY        | DWcrypSA   | 5' cell_exon-LV.exon_1b             | ex_1   | 19  | 2085174      | +   | <i>MOB3A</i>    | ACCGTG       |
| JY        | DWcrypSA   | 5' cell_exon-LV.exon_1b             | ex_8   | 19  | 2123829      | +   | <i>AP3D1</i>    | ACCTGG       |
| JY        | DWcrypSA   | 5' cell_exon-LV.exon_1b             | ex_4   | 19  | 2132470      | +   | <i>AP3D1</i>    | ACCAGT       |
| JY        | DWcrypSA   | 5' cell_exon-LV.exon_1b             | ex_3   | 19  | 2137010      | +   | <i>AP3D1</i>    | ACCTTA       |
| JY        | DWLUSA     | 5' cell_exon-LV.exon_1b - LV.exon_2 | ex_3   | 19  | 2137010      | +   | <i>AP3D1</i>    | ACCTTA       |
| JY        | DWcrypSA   | 5' cell_exon-LV.exon_1b             | ex_3   | 19  | 2520606      | +   | <i>GNG7</i>     | ACCTTG       |
| JY        | DWcrypSA   | 5' cell_exon-LV.exon_1b             | ex_7   | 19  | 2761458      | +   | <i>SGTA</i>     | ACCATG       |



| Cell Type | Primer set | Fusion Structure                    | Target  | Chr | Chr Position | Str | Gene         | Junction Seq |
|-----------|------------|-------------------------------------|---------|-----|--------------|-----|--------------|--------------|
| JY        | DWcrypSA   | 5' cell_exon-LV.exon_1b             | ex_1    | 19  | 3061158      | +   | AES          | ACCTGT       |
| JY        | DWcrypSA   | 5' cell_exon-LV.exon_1b             | ex_11   | 19  | 3977817      | +   | EEF2         | ACCTCC       |
| JY        | DWcrypSA   | 5' cell_exon-LV.exon_1b             | ex_18   | 19  | 10465188     | +   | TYK2         | ACCTCG       |
| JY        | DWcrypSA   | 5' cell_exon-LV.exon_1b             | ex_1    | 19  | 10490291     | +   | TYK2         | ACCTGA       |
| JY        | DWcrypSA   | 5' cell_exon-LV.exon_1b             | ex_9    | 19  | 46133209     | +   | EML2         | ACCTTG       |
| JY        | DWcrypSA   | 5' cell_exon-LV.exon_1b             | ex_3    | 19  | 52588040     | +   | ZNF841       | ACCTGA       |
| JY        | DWcrypSA   | 5' cell_exon-LV.exon_1b             | ex_1    | 22  | 50733148     | +   | PLXNB2       | ACCCCT       |
| JY        | DWcrypSA   | 5' cell_exon-LV.exon_1b             | ex_14   | X   | 153592390    | +   | FLNA         | ACCCCTG      |
| JY        | DWLVSA     | 5' cell_exon-LV.exon_1b - LV.exon_2 | ex_2    | 11  | 58352357     | -   | ZFP91-CNTF   | AAGGTA       |
| JY        | DWLVSA     | 5' cell_exon-LV.exon_1b - LV.exon_2 | ex_13   | 19  | 4433536      | -   | CHAF1A       | CAGGTG       |
| JY        | DWLVSA     | 5' cell_exon-LV.exon_1b - LV.exon_2 | ex_11   | 19  | 6750077      | -   | TRIP10       | GAGGTC       |
| JY        | DWLVSA     | 5' cell_exon-LV.exon_1b - LV.exon_2 | ex_5    | 19  | 34859607     | -   | GPI          | CAGGTA       |
| JY        | DWLVSA     | 5' cell_exon-LV.exon_1b - LV.exon_2 | ex_4    | X   | 123159768    | -   | STAG2        | AAAGTA       |
| JY        | DWLVSA     | 5' cell_exon-LV.exon_1b - LV.exon_2 | ex_2    | 13  | 113219425    | +   | TUBGCP3      | ACCTGT       |
| JY        | DWLVSA     | 5' cell_exon-LV.exon_1b - LV.exon_2 | ex_6    | 17  | 17782941     | +   | TOM1L2       | ACCTGC       |
| JY        | DWLVSA     | 5' cell_intr - LV.exon_2            | intr_1  | 16  | 28220309     | +   | XPO6         | CAATGG       |
| JY        | DWcrypSA   | 5' cell_intr-LV.exon_1a             | intr_30 | 15  | 43831216     | +   | HISPPD2A     | GCCTGA       |
| JY        | DWcrypSA   | 5' cell_intr-LV.exon_1a             | intr_19 | 16  | 2228662      | +   | CASKIN1      | GGGCAA       |
| JY        | DWcrypSA   | 5' cell_intr-LV.exon_1a             | intr_2  | 17  | 28088168     | +   | SSH2         | ACAGCT       |
| JY        | DWcrypSA   | 5' cell_intr-LV.exon_1b             | intr_1  | 4   | 83957184     | -   | COPS4        | TAGGTA       |
| JY        | DWcrypSA   | 5' cell_intr-LV.exon_1b             | intr_4  | 17  | 5114426      | -   | LOC100130950 | CAAGTG       |
| JY        | DWcrypSA   | 5' cell_intr-LV.exon_1b             | intr_1  | 17  | 5200809      | -   | RABEP1       | CAGGTC       |
| JY        | DWcrypSA   | 5' cell_intr-LV.exon_1b             | intr_1  | 6   | 29526882     | +   | UBD          | ACCCCT       |
| JY        | DWcrypSA   | 5' cell_intr-LV.exon_1b             | intr_4  | 12  | 116518434    | +   | MED13L       | ACCTTC       |
| JY        | DWcrypSA   | 5' cell_intr-LV.exon_1b             | intr_6  | 15  | 70366842     | +   | TLE3         | ACGGTA       |
| JY        | DWcrypSA   | 5' cell_intr-LV.exon_1b             | intr_1  | 16  | 28220308     | +   | XPO6         | ACAATG       |
| JY        | DWcrypSA   | 5' cell_intr-LV.exon_1b             | intr_1  | 16  | 67750541     | +   | GFOD2        | ACCTTC       |

| Cell Type | Primer set | Fusion Structure                 | Target | Chr | Chr Position | Str | Gene             | Junction Seq |
|-----------|------------|----------------------------------|--------|-----|--------------|-----|------------------|--------------|
| JY        | DWcrypSA   | 5' cell_intr-LV.exon_1b          | intr_2 | 19  | 2609424      | +   | <i>GNG7</i>      | ACCCTG       |
| JY        | DWLUSA     | 5' interg - LV.exon_2            | interg | 7   | 14079487     | +   | <i>None</i>      | TCTCTC       |
| JY        | DWcrypSA   | 5' interg-LV.exon_1a             | interg | 5   | 4242959      | +   | <i>None</i>      | AGAAAA       |
| JY        | DWcrypSA   | 5' interg-LV.exon_1a             | interg | 14  | 106329408    | +   | <i>None</i>      | ACCTGA       |
| JY        | DWcrypSA   | 5' interg-LV.exon_1b             | interg | 1   | 9690282      | -   | <i>None</i>      | CAGGTG       |
| JY        | DWcrypSA   | 5' interg-LV.exon_1b             | interg | 11  | 6767580      | +   | <i>None</i>      | ACCTGT       |
| JY        | DWLUSA     | 5' interg-LV.exon_1b - LV.exon_2 | interg | 2   | 119620369    | +   | <i>None</i>      | GAAAAA       |
| JY        | UPLVSD     | LV.exon_1 - 3' cell_exon         | ex_3   | 1   | 6253114      | -   | <i>RPL22</i>     | CTCCTG       |
| JY        | UPLVSD     | LV.exon_1 - 3' cell_exon         | ex_14  | 2   | 148693267    | -   | <i>ORC4L</i>     | AGCCTG       |
| JY        | UPLVSD     | LV.exon_1 - 3' cell_exon         | ex_7   | 3   | 189702379    | -   | <i>LEPREL1</i>   | ATTCTG       |
| JY        | UPLVSD     | LV.exon_1 - 3' cell_exon         | ex_4   | 10  | 97023820     | -   | <i>PDLIM1</i>    | CTCCTG       |
| JY        | UPLVSD     | LV.exon_1 - 3' cell_exon         | ex_7   | 12  | 57058584     | -   | <i>PTGES3</i>    | ATCCTG       |
| JY        | UPLVSD     | LV.exon_1 - 3' cell_exon         | ex_4   | 16  | 2013257      | -   | <i>RPS2</i>      | TTCCTG       |
| JY        | UPLVSD     | LV.exon_1 - 3' cell_exon         | ex_17  | 16  | 3808049      | -   | <i>CREBBP</i>    | GTCCTT       |
| JY        | UPLVSD     | LV.exon_1 - 3' cell_exon         | ex_3   | 16  | 29572972     | -   | <i>LOC440354</i> | TCTCTG       |
| JY        | UPLVSD     | LV.exon_1 - 3' cell_exon         | ex_9   | 17  | 17158259     | -   | <i>COPS3</i>     | GGTCTG       |
| JY        | UPLVSD     | LV.exon_1 - 3' cell_exon         | ex_11  | 17  | 45219802     | -   | <i>CDC27</i>     | CTCCTG       |
| JY        | UPLVSD     | LV.exon_1 - 3' cell_exon         | ex_9   | 18  | 28722041     | -   | <i>DSC1</i>      | GGATTT       |
| JY        | UPLVSD     | LV.exon_1 - 3' cell_exon         | ex_2   | 21  | 26802321     | -   | <i>LINC00158</i> | TTTCTA       |
| JY        | UPLVSD     | LV.exon_1 - 3' cell_exon         | ex_4   | 1   | 6931817      | +   | <i>CAMTA1</i>    | AGAGAT       |
| JY        | UPLVSD     | LV.exon_1 - 3' cell_exon         | ex_4   | 1   | 8029405      | +   | <i>PARK7</i>     | AGGGAC       |
| JY        | UPLVSD     | LV.exon_1 - 3' cell_exon         | 3' UTR | 1   | 53459285     | +   | <i>SCP2</i>      | AAAATA       |
| JY        | UPLVSD     | LV.exon_1 - 3' cell_exon         | ex_2   | 2   | 61118818     | +   | <i>REL</i>       | AGGTGC       |
| JY        | UPLVSD     | LV.exon_1 - 3' cell_exon         | ex_4   | 3   | 157920861    | +   | <i>RSRC1</i>     | AGGTCC       |
| JY        | UPLVSD     | LV.exon_1 - 3' cell_exon         | ex_5   | 4   | 39776454     | +   | <i>UBE2K</i>     | AGGGCA       |
| JY        | UPLVSD     | LV.exon_1 - 3' cell_exon         | ex_5   | 4   | 41946810     | +   | <i>TMEM33</i>    | AGGCAA       |
| JY        | UPLVSD     | LV.exon_1 - 3' cell_exon         | 3' UTR | 4   | 140311455    | +   | <i>NAA15</i>     | AGGTTT       |

| Cell Type | Primer set | Fusion Structure                             | Target | Chr | Chr Position | Str | Gene    | Junction Seq |
|-----------|------------|----------------------------------------------|--------|-----|--------------|-----|---------|--------------|
| JY        | UPLVSD     | LV.exon_1 - 3' cell_exon                     | ex_6   | 5   | 113822747    | +   | KCNN2   | AGGTAA       |
| JY        | UPLVSD     | LV.exon_1 - 3' cell_exon                     | ex_23  | 10  | 91505656     | +   | KIF20B  | AGGAGC       |
| JY        | UPLVSD     | LV.exon_1 - 3' cell_exon                     | ex_13  | 11  | 252505       | +   | PSMD13  | AGATCA       |
| JY        | UPLVSD     | LV.exon_1 - 3' cell_exon                     | ex_3   | 16  | 3117378      | +   | IL32    | AGGTCC       |
| JY        | UPLVSD     | LV.exon_1 - 3' cell_exon                     | ex_5   | 16  | 89629292     | +   | RPL13   | AGGTCT       |
| JY        | UPLVSD     | LV.exon_1 - 3' cell_exon                     | ex_5   | 17  | 2224600      | +   | SRR     | AGTCCA       |
| JY        | UPLVSD     | LV.exon_1 - 3' cell_exon                     | ex_4   | X   | 154456666    | +   | VBP1    | AGGAGT       |
| JY        | UPLVSD     | LV.exon_1 - 3' cell_intron                   | intr_2 | 6   | 41840054     | -   | USP49   | CAGCTA       |
| JY        | UPLVSD     | LV.exon_1 - 3' cell_intron                   | intr_2 | 16  | 10892858     | -   | FAM18A  | TCCCTA       |
| JY        | UPLVSD     | LV.exon_1 - 3' cell_intron                   | intr_3 | 6   | 124969798    | +   | NKAIN2  | AGTTCA       |
| JY        | UPLVSD     | LV.exon_1 - 3' intergenic region             | interg | 6   | 48211380     | -   | None    | AGTCTT       |
| JY        | UPLVSD     | LV.exon_1 - 3' intergenic region             | interg | 9   | 72844305     | -   | None    | GAACTG       |
| JY        | UPLVSD     | LV.exon_1 - 3' intergenic region             | interg | 13  | 47666452     | -   | None    | CCACTC       |
| JY        | UPLVSD     | LV.exon_1 - 3' intergenic region             | interg | 3   | 142712839    | +   | None    | AGCACG       |
| JY        | UPLVSD     | LV.exon_1 - LV.exon_2 - 3' cell_exon         | ex_13  | 3   | 32568400     | -   | DYNC1L1 | GGCTA        |
| JY        | UPLVSD     | LV.exon_1 - LV.exon_2 - 3' cell_exon         | ex_3   | 17  | 47700238     | -   | SPOP    | ACCCTG       |
| JY        | UPLVSD     | LV.exon_1 - LV.exon_2 - 3' intergenic region | interg | 7   | 10620311     | -   | None    | AACTG        |
| JY        | UPcrypSD   | LV.exon_2 - 3' cell_exon                     | ex_4   | 9   | 19093301     | -   | HAUS6   | ACCCTA       |
| JY        | UPcrypSD   | LV.exon_2 - 3' cell_exon                     | ex_17  | 16  | 56518779     | -   | BBS2    | CAACTG       |
| JY        | UPcrypSD   | LV.exon_2 - 3' cell_exon                     | ex_7   | 1   | 43166452     | +   | YBX1    | AGGGGC       |
| JY        | UPcrypSD   | LV.exon_2 - 3' cell_exon                     | ex_7   | 9   | 136217857    | +   | RPL7A   | AGGGAA       |
| JY        | UPcrypSD   | LV.exon_2 - 3' intergenic region             | interg | 7   | 45492743     | +   | None    | AGGAAA       |
| JY        | DWcrypSA   | LV.exon_3 - 3' cell exon                     | ex_60  | 1   | 19455568     | -   | UBR4    | AGCTA        |
| JY        | DWcrypSA   | LV.exon_3 - 3' cell exon                     | ex_10  | 1   | 85122167     | -   | SSX2IP  | AAACTA       |
| JY        | DWcrypSA   | LV.exon_3 - 3' cell exon                     | ex_9   | 2   | 17902528     | -   | SMC6    | CCGCTT       |
| JY        | DWcrypSA   | LV.exon_3 - 3' cell exon                     | ex_57  | 2   | 61459667     | -   | USP34   | CCACTG       |
| JY        | DWcrypSA   | LV.exon_3 - 3' cell exon                     | ex_14  | 3   | 195785503    | -   | TFRC    | CACCTG       |

| Cell Type | Primer set | Fusion Structure        | Target | Chr | Chr Position | Str | Gene             | Junction Seq |
|-----------|------------|-------------------------|--------|-----|--------------|-----|------------------|--------------|
| JY        | DWcrypSA   | LV.exon_3 - 3'cell exon | ex_4   | 4   | 100477377    | -   | <i>RG9MTD2</i>   | AAACTG       |
| JY        | DWcrypSA   | LV.exon_3 - 3'cell exon | ex_2   | 6   | 31760897     | -   | <i>VARS</i>      | AGCCTG       |
| JY        | DWcrypSA   | LV.exon_3 - 3'cell exon | ex_7   | 6   | 43533473     | -   | <i>XPO5</i>      | GCCCTA       |
| JY        | DWcrypSA   | LV.exon_3 - 3'cell exon | ex_11  | 6   | 146256577    | -   | <i>SHPRH</i>     | GATCTG       |
| JY        | DWcrypSA   | LV.exon_3 - 3'cell exon | ex_13  | 7   | 124481232    | -   | <i>POT1</i>      | TGCCTA       |
| JY        | DWcrypSA   | LV.exon_3 - 3'cell exon | ex_11  | 11  | 800666       | -   | <i>PIDD</i>      | CACCTG       |
| JY        | DWcrypSA   | LV.exon_3 - 3'cell exon | ex_15  | 11  | 28045397     | -   | <i>KIF18A</i>    | GAACTT       |
| JY        | DWcrypSA   | LV.exon_3 - 3'cell exon | ex_5   | 11  | 65652657     | -   | <i>FIBP</i>      | AGTCTG       |
| JY        | DWcrypSA   | LV.exon_3 - 3'cell exon | ex_4   | 12  | 15097773     | -   | <i>ARHGDI1B</i>  | CACCTG       |
| JY        | DWcrypSA   | LV.exon_3 - 3'cell exon | ex_2   | 12  | 46355640     | -   | <i>SCAF11</i>    | CACCTG       |
| JY        | DWcrypSA   | LV.exon_3 - 3'cell exon | ex_7   | 12  | 100482873    | -   | <i>UHRF1BP1L</i> | GCTCTA       |
| JY        | DWcrypSA   | LV.exon_3 - 3'cell exon | ex_5   | 15  | 65308865     | -   | <i>MTFMT</i>     | GGGCTA       |
| JY        | DWcrypSA   | LV.exon_3 - 3'cell exon | ex_6   | 17  | 1442246      | -   | <i>PITPNA</i>    | CACCTG       |
| JY        | DWcrypSA   | LV.exon_3 - 3'cell exon | ex_2   | 17  | 2381179      | -   | <i>METTL16</i>   | AGGCTG       |
| JY        | DWcrypSA   | LV.exon_3 - 3'cell exon | ex_16  | 17  | 18152197     | -   | <i>FLII</i>      | AACCTG       |
| JY        | DWcrypSA   | LV.exon_3 - 3'cell exon | ex_35  | 17  | 67246762     | -   | <i>ABCA5</i>     | CATCTG       |
| JY        | DWcrypSA   | LV.exon_3 - 3'cell exon | ex_48  | 17  | 76476868     | -   | <i>DNAH17</i>    | TACCTG       |
| JY        | DWcrypSA   | LV.exon_3 - 3'cell exon | ex_4   | 17  | 80020849     | -   | <i>DUS1L</i>     | AAACTG       |
| JY        | DWcrypSA   | LV.exon_3 - 3'cell exon | ex_13  | 17  | 80047048     | -   | <i>FASN</i>      | CACCTG       |
| JY        | DWcrypSA   | LV.exon_3 - 3'cell exon | ex_13  | 19  | 4690969      | -   | <i>DPP9</i>      | CATCTG       |
| JY        | DWcrypSA   | LV.exon_3 - 3'cell exon | ex_4   | 19  | 6387570      | -   | <i>GTF2F1</i>    | AACCTG       |
| JY        | DWcrypSA   | LV.exon_3 - 3'cell exon | ex_1   | 19  | 18426875     | -   | <i>LSM4</i>      | AAGCTG       |
| JY        | DWcrypSA   | LV.exon_3 - 3'cell exon | ex_4   | X   | 70329240     | -   | <i>IL2RG</i>     | TTCCTT       |
| JY        | DWcrypSA   | LV.exon_3 - 3'cell exon | ex_3   | 1   | 218478370    | +   | <i>RRP15</i>     | AGCGTG       |
| JY        | DWcrypSA   | LV.exon_3 - 3'cell exon | ex_2   | 6   | 30876811     | +   | <i>GTF2H4</i>    | AGGTGA       |
| JY        | DWcrypSA   | LV.exon_3 - 3'cell exon | ex_2   | 6   | 31583298     | +   | <i>AIF1</i>      | AGGAGG       |
| JY        | DWcrypSA   | LV.exon_3 - 3'cell exon | ex_15  | 6   | 117890783    | +   | <i>DCBLD1</i>    | AGGTTA       |

| Cell Type | Primer set | Fusion Structure        | Target  | Chr | Chr Position | Str | Gene    | Junction Seq |
|-----------|------------|-------------------------|---------|-----|--------------|-----|---------|--------------|
| JY        | DWcrypSA   | LV.exon_3 - 3'cell exon | ex_5    | 11  | 763344       | +   | TALDO1  | AGGGAG       |
| JY        | DWcrypSA   | LV.exon_3 - 3'cell exon | ex_3    | 11  | 118239346    | +   | UBE4A   | AGATGA       |
| JY        | DWcrypSA   | LV.exon_3 - 3'cell exon | ex_3    | 13  | 100172290    | +   | TM9SF2  | AGGTTT       |
| JY        | DWcrypSA   | LV.exon_3 - 3'cell exon | ex_36   | 14  | 102482193    | +   | DYNC1H1 | AGATCC       |
| JY        | DWcrypSA   | LV.exon_3 - 3'cell exon | ex_8    | 14  | 104139351    | +   | KLC1    | AGGTTT       |
| JY        | DWcrypSA   | LV.exon_3 - 3'cell exon | ex_14   | 16  | 722084       | +   | RHOT2   | AGCCTG       |
| JY        | DWcrypSA   | LV.exon_3 - 3'cell exon | ex_16   | 16  | 2225302      | +   | TRAF7   | AGGTGT       |
| JY        | DWcrypSA   | LV.exon_3 - 3'cell exon | ex_13   | 16  | 2647124      | +   | PDPK1   | AGGGTT       |
| JY        | DWcrypSA   | LV.exon_3 - 3'cell exon | ex_5    | 16  | 24566936     | +   | RBBP6   | AGACTG       |
| JY        | DWcrypSA   | LV.exon_3 - 3'cell exon | ex_4    | 16  | 30093805     | +   | PPP4C   | AGGTGT       |
| JY        | DWcrypSA   | LV.exon_3 - 3'cell exon | ex_2    | 17  | 5211989      | +   | RABEP1  | AGTTTC       |
| JY        | DWcrypSA   | LV.exon_3 - 3'cell exon | ex_3    | 17  | 7245267      | +   | ACAP1   | AGCTCC       |
| JY        | DWcrypSA   | LV.exon_3 - 3'cell exon | ex_5    | 17  | 7604059      | +   | WRAP53  | AGGTCC       |
| JY        | DWcrypSA   | LV.exon_3 - 3'cell exon | ex_4    | 17  | 61869772     | +   | DDX42   | AGCTAT       |
| JY        | DWcrypSA   | LV.exon_3 - 3'cell exon | ex_5    | 19  | 2245445      | +   | SF3A2   | AGGGCC       |
| JY        | DWcrypSA   | LV.exon_3 - 3'cell exon | ex_9    | 19  | 17273160     | +   | MYO9B   | AGGCCA       |
| JY        | DWcrypSA   | LV.exon_3 - 3'cell exon | ex_5    | 19  | 50295192     | +   | AP2A1   | AGGGAC       |
| JY        | DWcrypSA   | LV.exon_3 - 3'cell exon | ex_16   | 19  | 54656604     | +   | CNOT3   | AGGCAG       |
| JY        | DWcrypSA   | LV.exon_3 - 3'cell exon | ex_4    | 19  | 59058743     | +   | TRIM28  | AGGGCC       |
| JY        | DWcrypSA   | LV.exon_3 - 3'cell exon | ex_11   | 21  | 45736127     | +   | PFKL    | AGACTC       |
| JY        | DWcrypSA   | LV.intr_3 - 3'cell exon | intr_10 | 11  | 64963203     | +   | CAPN1   | AGGTAA       |

**Supplemental Table 1: List of aberrant transcripts identified by cLAM PCR**

*Cell type*: indicates the cell type (cord blood CD34+ or JY) in which the aberrant transcript was retrieved.

*Primer Set*: indicates the primer set used (see figure).

*Enz*: Enzyme used in the cLAM-PCR reaction.

*Fusion Structure*: depicts the structure of the aberrant transcript. The '-' sign indicates splicing between the two surrounding elements. LV.exon\_1 is defined by splice sites SA1 and SD1, LV.exon\_2 is defined by splice sites SA2 and (SD4). Genomic regions can be exons, introns, or intergenic regions.

*Target*: indicates the genomic element targeted by the aberrant splicing event. UCSC genome browser and RefSeq database were used to determine the exact splicing target. Exons are referred to the targeted gene (see *Gene* column), when applicable.

*Chr*: Chromosome number

*Chr Position*: Chromosomal position of the nucleotide targeted by the splicing event corresponds to the sequence identify breakpoint between LV and human genome

*Str*: Orientation of the aberrant transcript with respect to the human genome (+, first chromosomal strand; -, second strand).

*Gene*: RefSeq symbol of the targeted gene. 'None' is used when sequences from intergenic regions are mapped.

Human genome GRCh37/hg19 assembly was used to map the aberrant transcripts.

*Junction Seq*: sequence of the exonic/intronic junction of the genomic portions of our fusion transcript. Highlighted in red are the canonical dinucleotide splice signal found in intron (GT, in case of donor splice site; AG, in case of acceptor splice site). In blue are highlighted the non-canonical splice signal.

**Supplemental Table 2**

| SYSTEM | GENE CLASSES                                          | COUNT | p VALUE  | FOLD CHANGE |
|--------|-------------------------------------------------------|-------|----------|-------------|
| MF     | N-methyltransferase activity                          | 16    | 2.40E-06 | 4.3         |
| MF     | protein methyltransferase activity                    | 15    | 6.00E-06 | 4.2         |
| BP     | protein amino acid alkylolation                       | 13    | 8.90E-06 | 4.7         |
| BP     | protein amino acid methylation                        | 13    | 8.90E-06 | 4.7         |
| MF     | histone methyltransferase activity                    | 13    | 9.50E-06 | 4.7         |
| BP     | biopolymer methylation                                | 15    | 2.60E-04 | 3.1         |
| MF     | protein-lysine N-methyltransferase activity           | 10    | 2.70E-04 | 4.4         |
| MF     | lysine N-methyltransferase activity                   | 10    | 2.70E-04 | 4.4         |
| MF     | histone-lysine N-methyltransferase activity           | 10    | 2.70E-04 | 4.4         |
| MF     | arginine N-methyltransferase activity                 | 4     | 9.90E-03 | 8.1         |
| MF     | protein-arginine N-methyltransferase activity         | 4     | 9.90E-03 | 8.1         |
| BP     | sulfur amino acid biosynthetic process                | 5     | 1.80E-02 | 4.7         |
| BP     | methionine biosynthetic process                       | 4     | 2.10E-02 | 6.3         |
| BP     | central nervous system projection neuron axonogenesis | 4     | 4.70E-02 | 4.7         |

**Supplemental Table 2: Overrepresentation analysis of the gene targeted by LV integration sites in CD34+ and JY cell types.**

Go analyses performed on cellular genes targeted by LV integration in CD34+ and JY cells transduced with SINLV.PGK. Gene classes significantly overrepresented are indicated. Column System; MF, Molecular Function; BP, Biological Process. Count: number of genes identified in the dataset belonging to each specific class. P value: P values < 0.05 are shown. Significant p values after Bonferroni correction are highlighted. Fold Change: Fold increase over the predicted random distribution.

**Supplemental Table 3**

| Assay                      | PGK              | Mut_SD           | Mut 1_13         | Mut 14_15        |
|----------------------------|------------------|------------------|------------------|------------------|
| Vector Titer<br>(TU/ml)    | $2.3 \cdot 10^7$ | $2.1 \cdot 10^6$ | $2.7 \cdot 10^6$ | $2.5 \cdot 10^7$ |
| p24<br>(ng/ml)             | 330              | 460              | 160              | 270              |
| Infectivity<br>(TU/ng p24) | $7 \cdot 10^4$   | $5 \cdot 10^3$   | $1.6 \cdot 10^4$ | $9.4 \cdot 10^4$ |
| Single Copy MFI            | 7400±<br>400     | 7900±<br>300     | 7500±<br>160     | 7900±<br>300     |

**Supplemental Table 3: Titer and Infectivity of the recoded vector.**

Vector Titer: The titer is defined as number of transducing units per milliliter (TU/ml) of vector preparation.

It has been performed by end-point titration on 293T cell line.

p24: measure of the Gag capsid protein p24, it represents the total content of vector particles in the vector stock. It has been estimated by immune-capture ELISA assay.

Infectivity: transducing activity of the vector preparation *per* unit of physical particle.

Single Copy MFI: Mean Fluorescence Intensity of GFP transgene in 293T cells transduced @ single vector copy.



**Supplemental Table 4**

| <b>Assay</b>     | <b>Forward Primer</b> | <b>Reverse Primer</b>     | <b>Probe/ Context sequence</b> |
|------------------|-----------------------|---------------------------|--------------------------------|
| <b>U3RU5</b>     | GACCCACCTCCCAACCC     | TGTCTCTCTCTCCACCTTCTTCTTC | CAGGCCCGAAGGAATA               |
| <b>LV-FUSION</b> | CAGGACTCGGCTTGCTGAA   | GGTTGGGAGGTGGGTCAG        | TCGCCGCCCTCGCC                 |
| <b>U3RU5</b>     | NA                    | NA                        | GCTTCAAGTAGTGTGTGCCCGTCTG      |
| <b>SA-PPT</b>    | NA                    | NA                        | TCTCGACGGTATCGGTTAACTTTTA      |
| <b>HIV-SD</b>    | TACTGACGCTCTCGCACC    | TCTCGACGCAGGACTCG         | ATCTCTCTCCTTCTAGCCTC           |
| <b>B2M</b>       | NA                    | NA                        | AGTGGGATCGAGACATGTAAGCAGC      |
| <b>GFP</b>       | CAGCTCGCCGACCACTA     | GGGCCGTCGCCGAT            | CCAGCAGAACACCCCC               |

**Supplemental Table 4: Sequences of the Primers and Probes used for the RT qPCR analyses**
